# Supplementary material for: High Adherence to the Mediterranean Dietary Pattern Is Inversely Associated with Systemic Inflammation in Older but Not in Younger Brazilian Adults
Source: MDPI journal article supplement (doi:10.3390/nu16091385), 2024-05-02
Supplement: s1 [file s1]

## Supplementary file

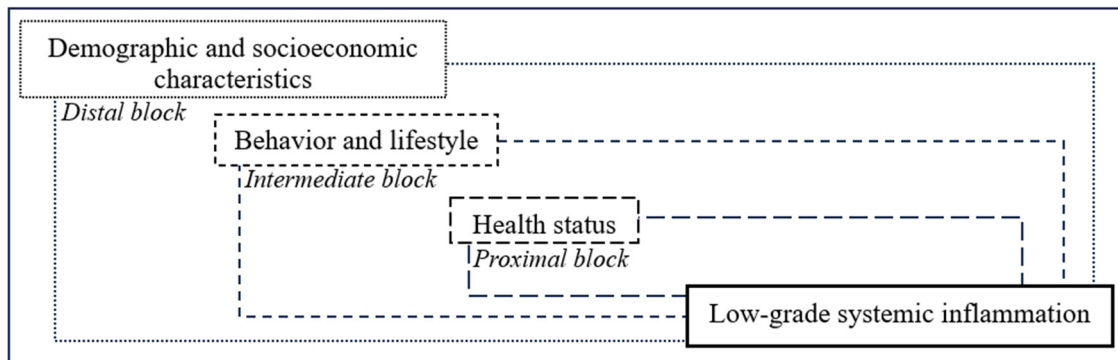

**Figure S1.** Hierarchical model for analyzing factors associated with low-grade systemic inflammation.
